# Supplementary material for: Molecular fingerprinting of bovine mastitis-associated Staphylococcus aureus isolates from India
Source: PubMed Central journal article supplement (PMC8316343; doi:10.1038/s41598-021-94760-x), 2021-07-27
Supplement: 41598_2021_94760_MOESM1_ESM.pdf [file 41598_2021_94760_MOESM1_ESM.pdf]

**Supplementary Table 1. Details for locations in Karnataka from where milk samples were collected to obtain the isolates.**

| <b>Isolate ID</b> | <b>Date of collection</b> | <b>Farm type</b> | <b>Location</b>     | <b>Taluk</b>        | <b>District</b> | <b>Region of the State</b> |
|-------------------|---------------------------|------------------|---------------------|---------------------|-----------------|----------------------------|
| KA1               | 17-09-2009                | Organized        | Huskur              | Doddaballapura      | Bengaluru Rural | Southeast                  |
| KA4               | 17-09-2009                | Organized        | Huskur              | Doddaballapura      | Bengaluru Rural | Southeast                  |
| KA6               | 06-10-2009                | Organized        | Bidar               | Bidar               | Bidar           | Northeast                  |
| KA8               | 05-11-2009                | Unorganized      | Chikkanayakanahalli | Chikkanayakanahalli | Tumkur          | Southeast                  |
| KA10              | 05-11-2009                | Unorganized      | Chikkanayakanahalli | Chikkanayakanahalli | Tumkur          | Southeast                  |
| KA12              | 05-11-2009                | Unorganized      | Chikkanayakanahalli | Chikkanayakanahalli | Tumkur          | Southeast                  |
| KA22              | 05-11-2009                | Unorganized      | Chikkanayakanahalli | Chikkanayakanahalli | Tumkur          | Southeast                  |
| KA24              | 05-11-2009                | Unorganized      | Chikkanayakanahalli | Chikkanayakanahalli | Tumkur          | Southeast                  |
| KA25              | 05-11-2009                | Unorganized      | Chikkanayakanahalli | Chikkanayakanahalli | Tumkur          | Southeast                  |
| KA26              | 05-11-2009                | Unorganized      | Chikkanayakanahalli | Chikkanayakanahalli | Tumkur          | Southeast                  |
| KA31              | 05-11-2009                | Unorganized      | Chikkanayakanahalli | Chikkanayakanahalli | Tumkur          | Southeast                  |
| KA38              | 06-10-2009                | Organized        | Bidar               | Bidar               | Bidar           | Northeast                  |
| KA41              | 15-12-2009                | Organized        | Hessaraghatta       | Bengaluru North     | Bengaluru Urban | Southeast                  |
| KA42              | 15-12-2009                | Organized        | Hessaraghatta       | Bengaluru North     | Bengaluru Urban | Southeast                  |
| KA46              | 15-12-2009                | Organized        | Hessaraghatta       | Bengaluru North     | Bengaluru Urban | Southeast                  |
| KA48              | 15-12-2009                | Organized        | Hessaraghatta       | Bengaluru North     | Bengaluru Urban | Southeast                  |
| KA55              | 20-10-2010                | Unorganized      | Ballur              | Anekal              | Bengaluru Rural | Southeast                  |
| KA56              | 20-10-2010                | Unorganized      | Ballur              | Anekal              | Bengaluru Rural | Southeast                  |
| KA57              | 20-10-2010                | Unorganized      | Ballur              | Anekal              | Bengaluru Rural | Southeast                  |
| KA58              | 20-10-2010                | Unorganized      | Ballur              | Anekal              | Bengaluru Rural | Southeast                  |
| KA59              | 20-10-2010                | Unorganized      | Ballur              | Anekal              | Bengaluru Rural | Southeast                  |
| KA60              | 20-10-2010                | Unorganized      | Ballur              | Anekal              | Bengaluru Rural | Southeast                  |
| KA61              | 20-10-2010                | Unorganized      | Ballur              | Anekal              | Bengaluru Rural | Southeast                  |
| KA62              | 20-10-2010                | Unorganized      | Ballur              | Anekal              | Bengaluru Rural | Southeast                  |
| KA63              | 20-10-2010                | Unorganized      | Ballur              | Anekal              | Bengaluru Rural | Southeast                  |

|       |            |             |                   |        |                 |           |
|-------|------------|-------------|-------------------|--------|-----------------|-----------|
| KA64  | 20-10-2010 | Unorganized | Ballur            | Anekal | Bengaluru Rural | Southeast |
| KA66  | 20-10-2010 | Unorganized | Ballur            | Anekal | Bengaluru Rural | Southeast |
| KA67  | 20-10-2010 | Unorganized | Ballur            | Anekal | Bengaluru Rural | Southeast |
| KA69  | 20-10-2010 | Unorganized | Ballur            | Anekal | Bengaluru Rural | Southeast |
| KA70  | 20-10-2010 | Unorganized | Ballur            | Anekal | Bengaluru Rural | Southeast |
| KA75  | 20-10-2010 | Unorganized | Thammanayakanalli | Anekal | Bengaluru Rural | Southeast |
| KA76  | 20-10-2010 | Unorganized | Thammanayakanalli | Anekal | Bengaluru Rural | Southeast |
| KA77  | 20-10-2010 | Unorganized | Thammanayakanalli | Anekal | Bengaluru Rural | Southeast |
| KA78  | 20-10-2010 | Unorganized | Thammanayakanalli | Anekal | Bengaluru Rural | Southeast |
| KA80  | 20-10-2010 | Unorganized | Thammanayakanalli | Anekal | Bengaluru Rural | Southeast |
| KA81  | 20-10-2010 | Unorganized | Thammanayakanalli | Anekal | Bengaluru Rural | Southeast |
| KA82  | 20-10-2010 | Unorganized | Thammanayakanalli | Anekal | Bengaluru Rural | Southeast |
| KA83  | 20-10-2010 | Unorganized | Thammanayakanalli | Anekal | Bengaluru Rural | Southeast |
| KA84  | 20-10-2010 | Unorganized | Thammanayakanalli | Anekal | Bengaluru Rural | Southeast |
| KA85  | 20-10-2010 | Unorganized | Thammanayakanalli | Anekal | Bengaluru Rural | Southeast |
| KA86  | 20-10-2010 | Unorganized | Thammanayakanalli | Anekal | Bengaluru Rural | Southeast |
| KA90  | 20-10-2010 | Unorganized | Thammanayakanalli | Anekal | Bengaluru Rural | Southeast |
| KA94  | 20-10-2010 | Organized   | Ballur            | Anekal | Bengaluru Rural | Southeast |
| KA103 | 24-01-2011 | Organized   | Hameelpura        | Bidar  | Bidar           | Northeast |
| KA107 | 24-01-2011 | Organized   | Hameelpura        | Bidar  | Bidar           | Northeast |
| KA115 | 25-01-2011 | Organized   | Bidar             | Bidar  | Bidar           | Northeast |
| KA119 | 25-01-2011 | Organized   | Bidar             | Bidar  | Bidar           | Northeast |
| KA123 | 26-01-2011 | Organized   | Bidar             | Bidar  | Bidar           | Northeast |
| KA124 | 26-01-2011 | Organized   | Bidar             | Bidar  | Bidar           | Northeast |
| KA128 | 02-02-2011 | Unorganized | Gunnahalli        | Bidar  | Bidar           | Northeast |
| KA131 | 02-02-2011 | Unorganized | Gunnahalli        | Bidar  | Bidar           | Northeast |
| KA132 | 02-02-2011 | Unorganized | Gunnahalli        | Bidar  | Bidar           | Northeast |
| KA133 | 02-02-2011 | Unorganized | Gunnahalli        | Bidar  | Bidar           | Northeast |
| KA134 | 02-02-2011 | Unorganized | Gunnahalli        | Bidar  | Bidar           | Northeast |

|       |            |             |              |               |       |           |
|-------|------------|-------------|--------------|---------------|-------|-----------|
| KA135 | 02-02-2011 | Unorganized | Gunnahalli   | Bidar         | Bidar | Northeast |
| KA138 | 02-02-2011 | Unorganized | Gunnahalli   | Bidar         | Bidar | Northeast |
| KA140 | 02-02-2011 | Unorganized | Gunnahalli   | Bidar         | Bidar | Northeast |
| KA144 | 02-02-2011 | Unorganized | Gunnahalli   | Bidar         | Bidar | Northeast |
| KA145 | 02-02-2011 | Unorganized | Gunnahalli   | Bidar         | Bidar | Northeast |
| KA148 | 04-02-2011 | Unorganized | Mandakanalli | Bidar         | Bidar | Northeast |
| KA149 | 04-02-2011 | Unorganized | Mandakanalli | Bidar         | Bidar | Northeast |
| KA150 | 04-02-2011 | Unorganized | Mandakanalli | Bidar         | Bidar | Northeast |
| KA151 | 04-02-2011 | Unorganized | Mandakanalli | Bidar         | Bidar | Northeast |
| KA152 | 04-02-2011 | Unorganized | Mandakanalli | Bidar         | Bidar | Northeast |
| KA154 | 04-02-2011 | Unorganized | Mandakanalli | Bidar         | Bidar | Northeast |
| KA155 | 04-02-2011 | Unorganized | Mandakanalli | Bidar         | Bidar | Northeast |
| KA156 | 04-02-2011 | Unorganized | Mandakanalli | Bidar         | Bidar | Northeast |
| KA159 | 02-02-2011 | Unorganized | Jajanmugali  | Basavakalyana | Bidar | Northeast |
| KA160 | 02-02-2011 | Unorganized | Jajanmugali  | Basavakalyana | Bidar | Northeast |
| KA161 | 02-02-2011 | Unorganized | Jajanmugali  | Basavakalyana | Bidar | Northeast |
| KA168 | 04-02-2011 | Unorganized | Kadwad       | Bidar         | Bidar | Northeast |
| KA169 | 04-02-2011 | Unorganized | Kadwad       | Bidar         | Bidar | Northeast |
| KA170 | 04-02-2011 | Unorganized | Kadwad       | Bidar         | Bidar | Northeast |
| KA171 | 04-02-2011 | Unorganized | Kadwad       | Bidar         | Bidar | Northeast |
| KA172 | 04-02-2011 | Unorganized | Kadwad       | Bidar         | Bidar | Northeast |
| KA174 | 04-02-2011 | Unorganized | Kadwad       | Bidar         | Bidar | Northeast |
| KA175 | 04-02-2011 | Unorganized | Kadwad       | Bidar         | Bidar | Northeast |
| KA176 | 04-02-2011 | Unorganized | Kadwad       | Bidar         | Bidar | Northeast |
| KA177 | 04-02-2011 | Unorganized | Kadwad       | Bidar         | Bidar | Northeast |
| KA180 | Unknown    | Clinic      | Bidar        | Bidar         | Bidar | Northeast |
| KA181 | Unknown    | Clinic      | Bidar        | Bidar         | Bidar | Northeast |
| KA182 | Unknown    | Clinic      | Bidar        | Bidar         | Bidar | Northeast |
| KA184 | Unknown    | Clinic      | Bidar        | Bidar         | Bidar | Northeast |

|       |         |             |             |            |                  |           |
|-------|---------|-------------|-------------|------------|------------------|-----------|
| KA192 | Unknown | Clinic      | Bidar       | Bidar      | Bidar            | Northeast |
| KA193 | Unknown | Clinic      | Bidar       | Bidar      | Bidar            | Northeast |
| KA194 | Unknown | Clinic      | Bidar       | Bidar      | Bidar            | Northeast |
| KA195 | Unknown | Unorganized | Uppinangadi | Puttur     | Dakshina Kannada | Southwest |
| KA196 | Unknown | Unorganized | Uppinangadi | Puttur     | Dakshina Kannada | Southwest |
| KA197 | Unknown | Unorganized | Uppinangadi | Puttur     | Dakshina Kannada | Southwest |
| KA198 | Unknown | Unorganized | Uppinangadi | Puttur     | Dakshina Kannada | Southwest |
| KA199 | Unknown | Unorganized | Uppinangadi | Puttur     | Dakshina Kannada | Southwest |
| KA200 | Unknown | Unorganized | Uppinangadi | Puttur     | Dakshina Kannada | Southwest |
| KA201 | Unknown | Unorganized | Uppinangadi | Puttur     | Dakshina Kannada | Southwest |
| KA202 | Unknown | Unorganized | Shivamogga  | Shivamogga | Shivamogga       | Central   |
| KA203 | Unknown | Unorganized | Shivamogga  | Shivamogga | Shivamogga       | Central   |
| KA204 | Unknown | Unorganized | Shivamogga  | Shivamogga | Shivamogga       | Central   |
| KA205 | Unknown | Unorganized | Shivamogga  | Shivamogga | Shivamogga       | Central   |
| KA206 | Unknown | Unorganized | Shivamogga  | Shivamogga | Shivamogga       | Central   |
| KA207 | Unknown | Unorganized | Shivamogga  | Shivamogga | Shivamogga       | Central   |

Notes:

1. The locations in the Northeast and the Southeast are separated by at least 600 km. The Southwest and Central locations are each about 300 km from the locations in the Southeast. The Southwest and Central locations are about 800 and 650 km, respectively, from the Northeast location.
2. Unorganized means small holding of a few animals by farmers.

**Supplementary Table S2. Newly identified ST profiles in the study**

| Isolate No. | ST   | CC | arcC | aroE | glpF | gmk | pta | tpi | yqiL |
|-------------|------|----|------|------|------|-----|-----|-----|------|
| GJ1         | 5407 | 8  | 3    | 3    | 1    | 1   | 8   | 8   | 6    |
| GJ2         | 5408 | 97 | 3    | 1    | 487  | 1   | 4   | 5   | 3    |
| GJ4         | 5410 | 30 | 2    | 2    | 5    | 2   | 4   | 3   | 3    |
| GJ5         | 5408 | 97 | 3    | 1    | 487  | 1   | 1   | 5   | 3    |
| GJ10        | 5411 | 97 | 3    | 1    | 487  | 1   | 1   | 5   | 10   |
| GJ13        | 5411 | 97 | 3    | 1    | 487  | 1   | 1   | 5   | 10   |
| GJ14        | 5408 | 97 | 3    | 1    | 487  | 1   | 1   | 5   | 3    |
| GJ17        | 5413 | 8  | 1    | 4    | 1    | 8   | 4   | 4   | 9    |
| GJ18        | 5414 | 97 | 3    | 1    | 487  | 1   | 1   | 5   | 96   |
| GJ25        | 5408 | 97 | 3    | 1    | 487  | 1   | 1   | 5   | 3    |
| GJ26        | 5415 | 97 | 1    | 1    | 487  | 8   | 1   | 5   | 3    |
| MG19        | 5418 | 9  | 3    | 3    | 1    | 1   | 1   | 4   | 10   |
| MG25        | 5418 | 9  | 3    | 3    | 1    | 1   | 1   | 4   | 10   |
| MG32        | 5419 | 9  | 3    | 3    | 645  | 1   | 264 | 1   | 13   |
| TG2         | 5419 | 9  | 3    | 3    | 645  | 1   | 264 | 1   | 13   |
| TG13        | 5420 | 9  | 3    | 3    | 487  | 1   | 264 | 1   | 10   |
| M35         | 5113 | 9  | 3    | 3    | 685  | 1   | 264 | 1   | 10   |
| KA205       | 5418 | 9  | 3    | 3    | 1    | 1   | 1   | 4   | 10   |
| KA207       | 5689 | 97 | 3    | 240  | 1    | 1   | 1   | 45  | 10   |

CC = Clonal Complex; GJ = Gujarat; KA = Karnataka; MG = Meghalaya; MH = Maharashtra; ST = Sequence Type; TG = Telangana; UP = Uttar Pradesh.

**Supplementary Table S3. Details of MRSA in the study**

| Isolate ID | Pulso type | OXA Disc | OXA MIC | <i>mec</i> A | SCC <i>mec</i> type | Toxin genes |             |            | spa type | ST   | CC   |
|------------|------------|----------|---------|--------------|---------------------|-------------|-------------|------------|----------|------|------|
|            |            |          |         |              |                     | <i>hlg</i>  | <i>tsst</i> | <i>pvl</i> |          |      |      |
| KA10       | G          | R        | 32      | +            | IVd                 | +           | +           | +          | t3380    | 2459 | CC97 |
| KA12       | C1         | R        | 16      |              |                     | +           | -           | -          | t4793    | 6    | CC5  |
| KA24       | C2         | R        | 16      |              |                     | +           | -           | -          | t359     | 2459 | CC97 |
| KA26       | C1         | R        | 16      | +            |                     | +           | -           | +          | t267     | 4992 | CC97 |
| KA54       | B2         | R        | 16      |              |                     | +           | -           | +          | NT       | 2459 | CC97 |
| KA55       | NT         | R        | 32      | +            |                     | +           | -           | +          | t359     | 2459 | CC97 |
| KA60       | C1         | R        | 32      | +            | IVb                 | -           | -           | +          | t359     | 2459 | CC97 |
| KA62       | C1         | R        | 16      | +            |                     | +           | -           | +          | t359     | 2459 | CC97 |
| KA69       | G          | R        | >64     | +            | IVd                 | +           | -           | +          | NT       | NT   | UA   |
| KA70       | C3         | R        | 64      |              |                     | +           | -           | +          | t267     | 1687 | CC97 |
| KA82       | H          | R        | 16      | +            |                     | +           | +           | +          | t359     | 2459 | CC97 |
| KA83       | H          | R        | 16      | +            |                     | +           | +           | +          | t359     | 2459 | CC97 |
| KA84       | I          | R        | 16      | +            | V                   | +           | +           | -          | t359     | 2459 | CC97 |
| KA86       | C1         | R        | 64      | +            | IVb                 | -           | -           | +          | NT       | NT   | UA   |
| KA94       | E8         | R        | 32      | +            | IVb                 | +           | -           | +          | t008     | 6    | CC5  |
| KA107      | E8         | R        | 16      | +            | IVb                 | -           | -           | -          | t10760   | 4968 | CC8  |
| KA119      | F1         | R        | 32      | +            |                     | +           | +           | +          | NT       | 672  | UA   |
| KA128      | F1         | R        | 32      | +            |                     | -           | -           | +          | NT       | NT   | UA   |
| KA135      | E2         | R        | 16      |              |                     | +           | +           | +          | t2700    | 2454 | CC9  |
| KA169      | C3         | R        | 64      | +            |                     | -           | -           | +          | t359     | 4975 | CC9  |
| KA175      | E7         | R        | 16      |              |                     | +           | +           | +          | t16344   | 2454 | CC9  |
| KA176      | E7         | R        | 32      |              |                     | +           | +           | +          | t7867    | 9    | CC1  |
| KA193      | E7         | R        | 32      | +            |                     | +           | +           | -          | t4522    | 2454 | CC9  |
| KA196      | D3         | R        | 16      |              |                     | +           | +           | +          | t002     | 3081 | CC5  |
| KA200      | A1         | R        | 32      |              |                     | +           | -           | +          | t657     | 772  | CC1  |
| KA201      | D4         | R        | 16      |              |                     | +           | -           | +          | t7287    | 5098 | CC1  |
| MG7        | C4         | R        | 32      | +            | IVb                 | -           | -           | -          | t7867    | 2454 | CC9  |
| MG32       | NT         | R        | 32      |              |                     | -           | -           | -          | t657     | 5419 | CC9  |
| TG14       | E4         | R        | 32      | +            | IVb                 | -           | -           | -          | t7867    | 2454 | CC9  |
| TG15       | E2         | R        | 8       | +            | IVb                 | +           | -           | -          | NT       | 2454 | CC9  |
| UP3        | D3         | R        | >64     | +            | IVb                 | -           | -           | -          | t7867    | 2454 | CC9  |
| UP7        | D3         | R        | 64      |              |                     | -           | -           | -          | t17680   | 2454 | CC9  |
| UP14       | E4         | R        | 64      |              |                     | -           | -           | -          | t7867    | 2454 | CC9  |
| UP15       | NT         | R        | 64      |              |                     | -           | -           | -          | t4522    | 2454 | CC9  |

CC = Clonal Complex; KA = Karnataka; MIC = minimum inhibitory concentration; MG = Meghalaya; NT = Non-typeable; OXA = oxacillin; ST = Sequence Type; TG = Telangana; UA = unassigned; UP = Uttar Pradesh.

**Supplementary Table S4. Details of OS-MRSA in the study**

| Isolate ID | Pulso type | OXA Disc | OXA MIC | <i>mecA</i> | SCC <i>mec</i> type | Toxin genes |             |            | spa type | ST   | CC   |
|------------|------------|----------|---------|-------------|---------------------|-------------|-------------|------------|----------|------|------|
|            |            |          |         |             |                     | <i>hlg</i>  | <i>tsst</i> | <i>pvl</i> |          |      |      |
| KA48       | C2         | S        | 2       | +           | IVb                 | +           | -           | +          | t359     | 2459 | CC97 |
| KA63       | C2         | S        | 1       | +           | IVb                 | +           | -           | +          | t267     | 97   | CC97 |
| KA76       | G          | S        | 1       | +           | V                   | +           | -           | +          | NT       | 3881 | CC1  |
| KA77       | C3         | S        | 1       | +           | IVb                 | +           | -           | +          | t2770    | 2459 | CC97 |
| KA78       | C3         | S        | 2       | +           | V                   | +           | -           | +          | t267     | 1687 | CC97 |
| KA81       | NT         | S        | 1       | +           | IVb                 | +           | -           | -          | t359     | 2459 | CC97 |
| KA90       | NT         | S        | 1       | +           | IVb                 | +           | +           | +          | t7683    | 2459 | CC97 |
| KA123      | F1         | S        | 1       | +           | -                   | -           | -           | -          | t2297    | 2453 | CC97 |
| KA133      | B2         | S        | 1       | +           | -                   | +           | +           | +          | NT       | 1687 | CC97 |
| KA154      | NT         | S        | 1       | +           | IVb                 | +           | +           | +          | t021     | 1482 | CC30 |
| KA172      | C4         | S        | 1       | +           | -                   | +           | -           | +          | t3841    | 672  | UA   |
| MG3        | C4         | S        | 1       | +           | IVb                 | +           | -           | -          | t7867    | 2454 | CC9  |
| MG5        | C4         | S        | 2       | +           | IVb                 | +           | -           | -          | t17680   | 2454 | CC9  |
| MG8        | C4         | S        | 1       | +           | IVb                 | -           | -           | -          | t1201    | 2459 | CC97 |
| MG9        | NT         | S        | 1       | +           | IVb                 | -           | -           | -          | t1201    | 2454 | CC9  |
| MG10       | E2         | S        | 2       | +           | IVb                 | -           | -           | -          | t4522    | 2454 | CC9  |
| MG19       | E3         | S        | 1       | +           | IVb                 | -           | -           | -          | t2700    | 5418 | CC9  |
| MG38       | E2         | S        | 1       | +           | IVb                 | -           | -           | -          | t4522    | 2454 | CC9  |
| MH16       | A2         | S        | 1       | +           | IVb                 | +           | +           | -          | t7867    | 2454 | CC9  |
| TG4        | E2         | S        | 2       | +           | IVb                 | -           | -           | -          | t4522    | 2454 | CC9  |
| TG10       | E2         | S        | 1       | +           | IVb                 | -           | -           | -          | t4522    | 2454 | CC9  |
| UP2        | E1         | S        | 1       | +           | IVb                 | -           | -           | -          | t7867    | 2454 | CC9  |
| UP5        | D3         | S        | 1       | +           | IVb                 | -           | -           | -          | t17680   | 2454 | CC9  |
| UP6        | E4         | S        | 2       | +           | IVb                 | -           | +           | -          | t7867    | 2454 | CC9  |

CC = Clonal Complex; KA = Karnataka; MIC = minimum inhibitory concentration; MG = Meghalaya; MH = Maharashtra; NT = Non-typeable; OXA = oxacillin; ST = Sequence Type; TG = Telangana; UA = unassigned; UP = Uttar Pradesh.

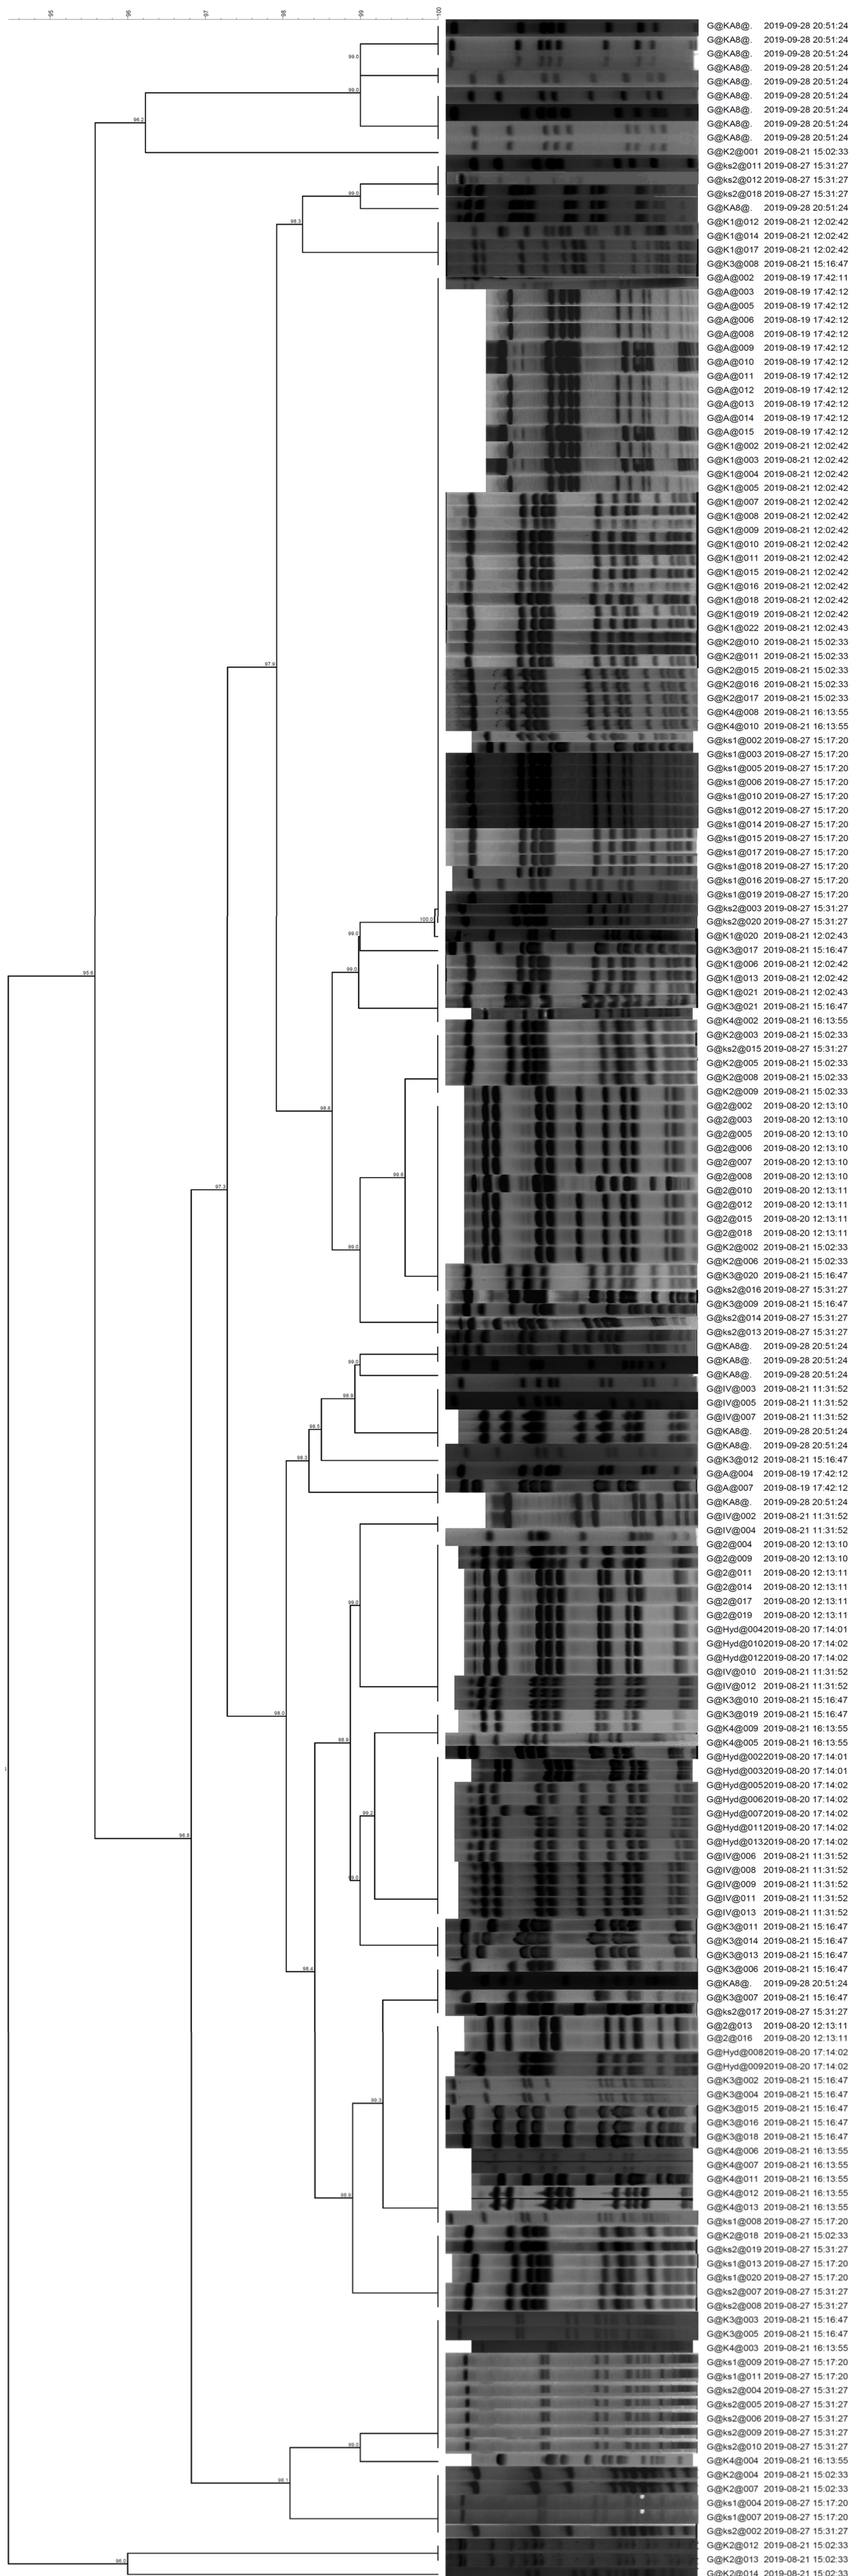

Supplementary Figure S1. Pulsed-field gel electrophoresis data and pulsotypes analysis. Description can be found in the Materials and Methods section.
